# Supplementary material for: Modelling Ocean Colour Derived Chlorophyll-a
Source: Copernicus journal article supplement (doi:10.5194/bg-2017-341), 2017-08-21
Supplement: Supplementary file [file bg-2017-341-AC1-supplement.pdf]

We thank the reviewer for this constructive review, and respond to each point below in blue text, and proposed altered text in italics.

This manuscript provides an overview on the how a coupled biogeochemical-ecosystem-optical model can be used to explore ocean colour algorithms, with a focus on Chlorophyll-a. The authors effectively show the kind of interrogation studies that can be done with this type of “virtual laboratory”. They clearly demonstrate how the ocean colour community can explore the bias and uncertainties of algorithms and their products, by investigating the effect of (1) other optically significant materials on derived Chlorophyll-a, and (2) different sized and regionally focused training datasets on robustness of an algorithm. I think this manuscript paves the ground for more detailed studies on the use of a radiative transfer component in a biogeochemical-ecosystem model to investigate ocean colour algorithms. The manuscript is well-written and logically presented, but there are a couple of points where I think a bit more clarity would improve the presentation of the methods & results (see comments).

We thank the reviewer for these positive comments, and especially the understanding of the premise of the paper as a “virtual laboratory”. We hope that this study will allow for others that use such a laboratory for studying ocean colour algorithms and products.

Specific comments:

P2 L20-21: the band-ratio definitely used to be the most commonly used Chl-a algorithm for NASA, but they switched their “default” Chl-a to a merged approach of Hu et al. (2012) and the OCx type algorithms in Reprocessing 2014.0. I am not suggesting you redo your analysis using the band-difference algorithm (because as I understand it, the point in the paper is more to show the kind of analysis you can do with this type of “virtual laboratory”, and dealing with multiple Chl-a algorithms might confuse matters - that being said, it would be an interesting task), but I think it might be worth acknowledging that the OCx algorithms are not the most common for NASA anymore.

Hu et al. (2012), J Geophys. Res., 117(C1). doi: 10.1029/2011jc007395

This is a good point. We had used OC4, because this was what was used on the OC-CCI Chl-a product that we show in Figure 1. We however note that the latest OC-CCI product has switched to a blend of OC3, OC4+CI, OC5. But the improvements in algorithms with new reprocessing of the NASA products is important to acknowledge. We plan to include statements to this effect in the introduction and conclusions of a revised paper. Including a statement that the model might be a good place to explore some of the newer algorithms.

In the introduction we now include the following (underlined are added and altered text):

*“There are significant work to improve algorithms. For instance, the newest National Aeronautics and Space Administration (NASA) reprocessing of Chl-a products has included a merged approach which uses different combination of reflectance bands at low Chl-a (Hu et al., 2012). There have also been many attempts to develop more mechanistically derived algorithms (e.g. using known relationships between absorption, scattering and reflectance). Here we focus on the Chl-a estimated from the blue/green reflectance as it is still the most commonly known product, and until very recently used in products downloaded from both NASA and the European Space Agency (ESA) data portals, as well as in merged products such as the Ocean Colour Climate Change Initiative (OC-CCI). However we note that similar techniques used in this paper could help inform on other algorithms. That the satellite-derived products have large errors and specific regional biases is relatively well understood in the ocean colour scientific*

*community (Hu et al., 2000, Moore et al., 2009; Blondeau-Parissier et al., 2014; Szeto et al., 2011). However, there remain many aspects of errors, biases and uncertainties that are poorly quantified, particularly...*

In the conclusion, we finish with:

*“We also hope that the ocean colour community will see the potential of model approaches such as this for deriving sampling strategies, further studies on newer Chl-a algorithms (e.g. NASA Reprocessing 2014.0, and OC-CCI V3 release), other ocean colour products, and will help with algorithm developments for current and future ocean colour measurements.”*

P4 L29-30: While this appears to be true for the January images, it seems to me that the July OC-CCI image (1d) has higher values in the northern high latitudes (around Greenland, Bering Sea, around Scandinavia) than actual July image (1e).

Yes, this is true. The larger values are most notable in the Southern Ocean and in January in the North Pacific. We will make this clearer in the revised version of the paper. We alter this sentence to:

*“As noted (and discussed more fully) in Dutkiewicz et al (2015) there are biases between the model and the observations, in particular larger values in the Southern Ocean and seasonally in the North Pacific than in the real-world satellite-derived Chl-a (Fig 1a,b,d,e).”*

We also are more precise when discussing the model Chl-a (both derived and actual) to OC-CCI at the end of section 3.1 (see below).

P5 L15-27: It is a bit unclear to me which results we are comparing at different points in this paragraph e.g. are the “observations” (L19) the OC-CCI observations? What is the “real world actual Chl-a” (L24)? L19-20: Are you saying the model blue Rrs is too high in the equatorial regions compared to the OC-CCI, coincident with where the model “actual” Chl-a is too low compared to the OC-CCI? Are you meaning OC-CCI is the “real ocean”? Maybe this sentence could be reworded to clarify this.

Indeed this is a difficult section to read (and write). We have tried to rewrite clearer, laying out the terminology first in the introduction. We now refer to the real world OC-CCI Chl-a product, rather suggesting OC-CCI is the “real ocean”. We first have a statement in the introduction to emphasis why we use the term “real-world”:

*““(In this article “real-world” will be used to refer to the real ocean and the real derived ocean colour products that are provide by space agencies. The “real world” is thus different to the numerical biogeochemical/ecosystem/optical model output and the products derived from it.)”*

And have rewritten this Rrs comparison section as (underlined is added or altered text):

*“We compare the model output to real world remotely sensed reflectance using the OC-CCI product (Fig 2). We note that the model does not have the exact same wavebands as any of the ocean colour satellites, and as such here we compare to the nearest bands: 450nm model to 443nm for the OC-CCI product, and 550nm model to the 555nm OC-CCI product. The model captures the reversed patterns between blue (443nm/450nm) and green (555nm/550nm)  $R_{RS}$  between gyres and high productive regions. The model blue  $R_{RS}$  (Fig 2a,b,c,d) captures the spatial and seasonal patterns in the real world satellite product. However, the model has lower blue  $R_{RS}$  in the southern Pacific gyre in January. We note though that the model lowest Chl-a in this region is offset from the real-world OC-CCI product (Fig 1a,b). Similarly the model blue  $R_{RS}$  is too high in the equatorial Atlantic and Pacific, but where the model Chl-a is likely too low relative to the real world Chl-a product (see Fig 1). The model has noticeably higher green (550nm)  $R_{RS}$  in the equatorial Atlantic and Indian than the satellite measurements but note that these are regions of high cloud cover where the real world satellite product may be biased. We also find higher green  $R_{RS}$  (Fig 2 e,f,g,h) in the North Pacific, but this might be due to model Chl-a being too high in this region (see Fig 1). In general the differences between model and the real world satellite  $R_{RS}$  appear often to be linked to discrepancies between the model and real world satellite derived Chl-a product (and likely also in situ measurements). The model blue and green  $R_{RS}$  appears to be consistent with the model actual Chl-a fields in a way that is similar to the real world and as such we believe appropriate and useful to use these model remotely sensed reflectance (“model ocean colour”) to construct “satellite-like-derived” Chl-a using the blue to green reflectance ratio algorithm.”*

P7 L4: I think this sentence could be more clearly explained. I think I understand the point you are making: that because the model derived Chl-a compares better with the OC-CCI Chl-a than the model actual Chl-a does, then some of the difference between OC-CCI and model actual Chl-a can be attributed to problems with the band-ratio algorithm (i.e. “product bias”)? Is this what you mean by “product bias” - that there is an intrinsic problem with the band ratio formulation? I think the use of term “model” at the end of this sentence is particularly confusing: often in the ocean colour community, the term “model” is used in terms of a bio-optical proxy/relationship e.g. Chl-a is modelled using the band-ratio. Perhaps use “ecosystem model” (or something similar), to make this distinction clear.

Yes, you understand the point we are trying to make. We have rewritten this section to make this clearer, and in particular added “biogeochemical/ecosystem/optical” to clarify “model”. This difference in use of “model” is important and we try to be careful not to be ambiguous in the paper. In particular we add a sentence to the last paragraph of the introduction to clarify this:

*“Additionally in this article, when we use the word “model”, we refer to the numerical biogeochemical/ecosystem/optical model: In the ocean colour community “model” often refers to bio-optical relationships, we do not use “model” with this definition here.”*

And this section (P7, L4, the last paragraph in Section 3.1) has been rewritten (taking Reviewer 2’s comments into account as well) as (added or altered text underlined):

*“Finally in this section, we ask: Which model Chl-a (derived versus actual) best matches real-world OC-CCI product? We do not do this not for model validation purposes (see evaluation in Dutkiewicz et al., 2015), but rather to re-emphasize that the satellite derived Chl-a products are proxies for real world actual*

Chl-a: the two are not the same thing. We compare model climatological monthly model derived Chl-a and model actual Chl-a to OC-CCI monthly climatology regrided to the model configuration (1 degree resolution). We find that the model derived Chl-a has global RMSE of  $0.2867\text{mg}/\text{m}^3$ , which is significantly lower than  $0.6370\text{mg}/\text{m}^3$  found when comparing model actual Chl-a to OC-CCI. Comparisons are particularly better for the Southern Ocean and North Pacific (Fig 1). Consequently, some (though certainly not all) of the biases noted when comparing model actual Chl-a (Fig 1b,e) to real world satellite derived Chl-a products (Fig 1a,d, section 2 and in the model evaluation done in Dutkiewicz et al. 2015) are due to the real world Chl-a derived product bias and not a deficiency in the biogeochemical/ecosystem/optical model. It follows that a model satellite-like derived products (Fig 1 c,f) might be a better evaluation tools for comparing to ocean colour products derived with the same algorithm (Fig 1a,d) than the model actual Chl-a fields themselves.”

P10 L2-5 (& Appendix B): The exact method is a bit unclear to me here. Did you: take the results of the full run (i.e. those shown in Fig 5a), then take the monthly mean of Rrs output and Chl-a input and derive the 4th order polynomial coefficients on those monthly means? Then, for each of the 3 experiments, did you: do a full run with daily values, take the monthly mean of the model output Rrs and input Chl-a, and use the monthly band-ratio relationship with the monthly Rrs for input? Or did you set up the model with monthly means for the input? Perhaps this could be clarified in the text.

The problem with the sensitivity studies was saving the daily fields for 15 years. So instead we saved off the monthly fields instead. Thus model output for these sensitivity studies was monthly means of Rrs and monthly means of Chl-a. The “default” simulation was rerun saving off the monthly means (rather than the daily means used in Fig 5) so that it would be directly comparable to the sensitivity studies. The 4<sup>th</sup> order polynomials were calculated with these monthly means. We try to explain this clearer in the text now (underlined are altered text).

In main text we propose to have the following statement to make this clearer:

“However given computational and storage constraints we used monthly averaged values of Chl-a and  $R_{RS}$  to calculate the algorithm coefficients in these experiments rather than daily values (see Appendix B for discussion).”

And for Appendix B we will suggest the following as a change (underlined are the altered text):

“The daily values for 15 years, at each grid point creates a very large datafile. Diagnostics with, and storage of this large dataset becomes extremely computationally expensive. In order to conduct sensitivity studies we found that we needed to reduce this data set. Here we explore only outputting monthly means of model  $R_{RS}$  and Chl-a and thus reducing the dataset by  $1/30^{\text{th}}$ . We determined the algorithm coefficients ( $a_0$  to  $a_4$  in Eq 1) using monthly rather than daily means subsampling for the GS approach. The resulting function (Fig 4, solid black) is similar at low and intermediate of Chl-a, but does deviate at high Chl-a from the algorithm found using daily mean values (light blue line). The  $r^2$  from this algorithm with coefficients defined with monthly means was also not quite as good as that found using daily means (see Table 2 and 3). However we found that the results were similar enough that we could obtain qualitative comparison between sensitivity experiments EXP-1, EXP-2, EXP-3 discussed in Section

5). We also note that the resulting two dimensional histogram (Fig 11) has far lower density when using 4 million relative to 140 million points. Though not perfect, using monthly output does allow us to perform EXP-1 through EXP-3 and still feel confident that the between experiment differences are robust.”

Fig 11: If I am understanding correctly, Fig 11a is the same as Fig 5a, but 11a uses the monthly coefficients i.e. the black line in Fig 4, whereas 5a uses the light blue line. I think it would be useful to point this out explicitly.

Yes, Fig 11a uses coefficients found using monthly mean Chl-a and  $R_{RS}$ . And yes, the different functions are given by light blue and black lines in Figure 4. We plan to add a further sentence to Fig 11 to make this point. Thus together with the sentences already in the caption we will have the following to clarify this different (underlined are altered text):

*“In these plots, monthly mean output of Chl-a and  $R_{RS}$  were used to calculate the algorithm, and only monthly mean output is shown (4 million versus 140 million points), thus at a great computational savings. The difference in the algorithm is shown in Figure 4 (the light blue (coefficients using daily values) versus the solid black line (coefficients using monthly values)). Differences between 11a and 5a are due to this difference in sampling (discussed in Appendix B). Also notice the difference in values on the colourbars between this figure and Figure 5.”*

P12 L20-21 & L33-P13 L1: I’m not so sure it is quite as simple as this. I agree that the other optically significant materials are contributing to false Chl-a signals: there is a shoulder in all the derived Chl-a time series (Fig 8a), that aligns perfectly with the peak in CDOM and detritus (Fig 8b). But you can see the pattern of the actual Chl-a signal in the derived values, with peaks aligning on around days 60 and 75 - the magnitude of these derived values are just less than the actual values, but I’d say these are the “true peaks” of the spring bloom. After approximately day 75, there is the interference from CDOM and detritus, hence when calculating the initiation of the spring bloom (as described in the appendix), this large “false peak/shoulder” increases the median Chl-a and skews the determined initiation date. So I think what your data could be showing is (1) the Chl-a products do capture the peak of the spring bloom, but the magnitude of that peak is too small, and (2) the CDOM and detritus contribute to a false Chl-a signal, which makes it appear as if the bloom lasts longer and (depending on how you define bloom initiation) makes the initiation date appear to lag compared to the model actual.

We agree that that there is an alignment with the first peak (around day 60), but there is an offset for the maximum peak. Indeed, some of the points we make here are subject to what we define as the “initiation” and “peak”, and we now make this clearer in the revised text: see below.

We use the definitions of Coles et al (2012) and to make our points clearer, we have added extra lines to Fig 8 (see below) to show the timing of the “initiation”. Thus, for this definition of initiation there is indeed a lag between the derived products and the actual Chl-a. (Fig 9) We add text to clarify this – i.e. acknowledging that the products are capturing the peaks at some times and not others. We also add a figure of the maximum peak offset as an additional panel for Figure 9 (b), as well as for the difference in timings of initiation for CDOM and detrital matter in response to a comment by reviewer 2.

Section 4 will now read (underlined indicates new or altered text):

“We have noted that in all approaches, though even more obvious in RA, there is a seasonally altering pattern between the derived and actual model Chl-a (Fig 6). The amplitude of the peak of spring blooms is often underestimated in the products derived using global coefficients (GS and GA) in high latitude, especially in the subsampled algorithm (GS) (Figs 6). , Derived Chl-a values were also often higher than model actual Chl-a outside of bloom peaks. We consider the phenology using a single location (in the subpolar North Atlantic) for a single year as illustration (Fig 8a). Though the derived products show similar (though smaller) peaks to the actual Chl-a, and sometimes similar peak timing early in the season (see for instance the first distinct peak in this illustrative location), there are noticeable lags for the maximum peak (shown with a dotted line) and other mismatches later in the season. We also find that the bloom period lasts later into the year. The actual Chl-a also starts its sharp increase in spring (the initiation of the spring bloom, shown with dashed line) considerably before all three derived products (Fig 8a). We follow the approach of Cole et al (2012) for determining the “initiation of the spring bloom” as the time when the Chl-a first increases 5% above the annual median (horizontal dashed line, more description in Appendix A).

Figure 8 shows just one location for 1 year. To consider the large scale patterns, we determine the lag in the spring initiation (Fig 9a) and maximum bloom timing (Fig 9b) for each location averaged over all years. We find that in almost all locations the derived Chl-a shows the bloom starting later than the model actual Chl-a (Fig 9a). This offset is typically by about 5-10 days but can be as much as 30 days. The maximum Chl-a from the derived product also lags the actual Chl-a in most locations, though by only a few days (Fig 9b). These results indicate that temporal as well as spatial biases occur as a result of deriving Chl-a from X and suggests care should be taken when calculating phenology from satellite products or when evaluating phenology in models using satellite-derived Chl-a. We discuss the reason for the lags in the next section.”

And the following caveats in section 5:

“We add the caveats that the exact definition of “initiation of bloom” does impact how much of a lag there is in the phenology. For instance, if the first peak in the model actual Chl-a in Figure 8a was defined as “the spring bloom” we would suggest the derived Chl-a does capture the timing better (though not the magnitude). We also note that the model parameterization of CDOM and detrital particle are not necessarily sufficiently well developed to make quantitative statements on the likely real-world lags. Thus though we do suggest there could be significant lags in phenology in the real world, we do not suggest that the values in Figure 9 are necessarily accurate for the real world. This analysis should instead be seen as a cautionary statement about using satellite-derived products for phenology of the quantities for which they are proxies.”

And more-over are careful in the rest of the text to discuss “phenology” rather than “spring bloom” such that the role of definitions of timing are not as relevant.

New versions of Figure 8 and 9 and their captions (altered of added text underline) are provide here. Extra panels in Figure 9 are added at Reviewer 2’s suggestion.

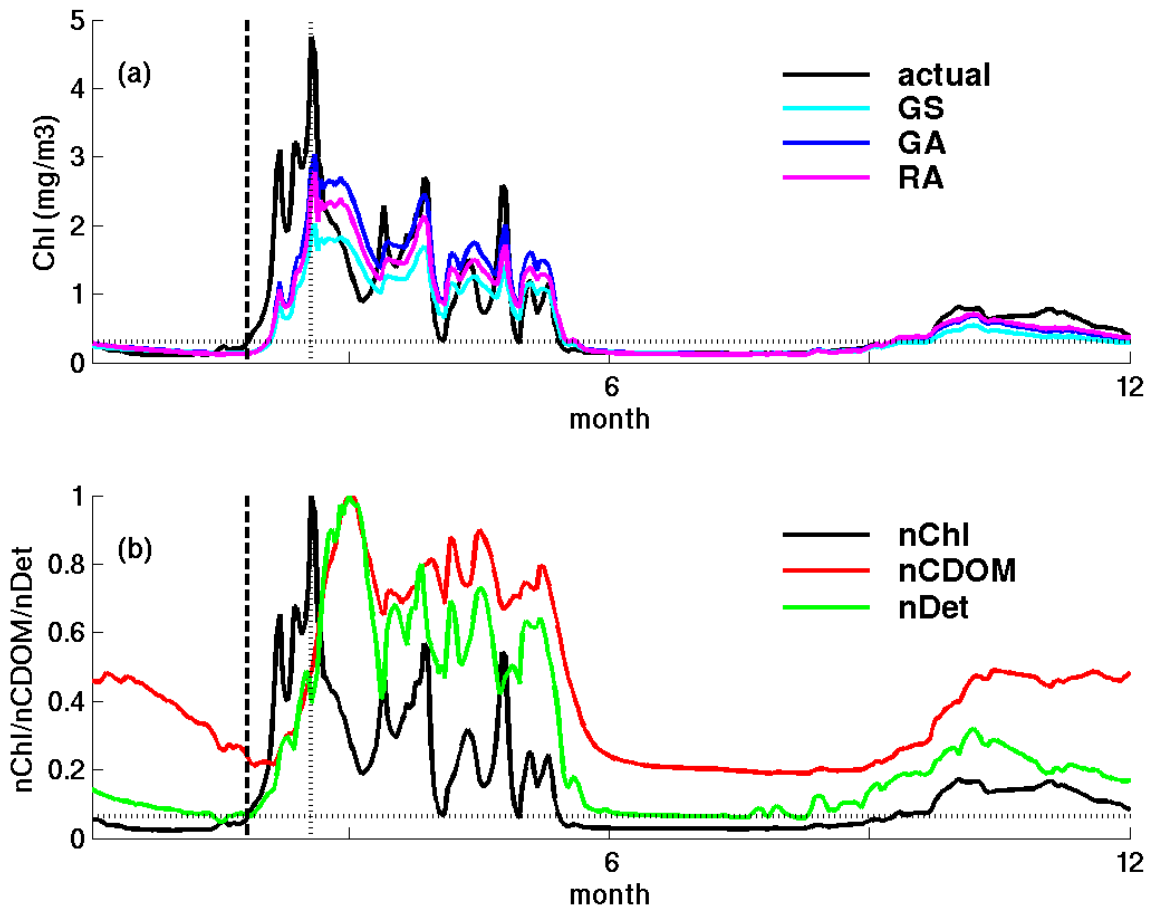

*Figure 8: Illustrative timeseries for one year from a single location in the North Atlantic (shown as x on Fig 9). (a) “actual” Chl-a (black), derived Chl-a using subsampled output (GS, light blue), derived Chl-a using all output (GA, dark blue), and the Chl-a product derived using a regional specific algorithm (RA, purple). (b) actual Chl-a (black), CDOM (red) and detritus (green), all normalized to their peak value. Dashed vertical line indicates the “initiation of the bloom” which is taken to be when Chl-a reaches 5% above the annual median value (dotted horizontal line shows this value for the model actual Chl-a), following Cole et al (2012) and discussed further in Appendix A. The vertical dotted line indicates the peak of the bloom. Shown here is only a single year and location, however for larger scale perspective, the difference in initiation and peak timing between model actual and derived Chl-a averaged over all years are shown for the globe in Figure 9.*

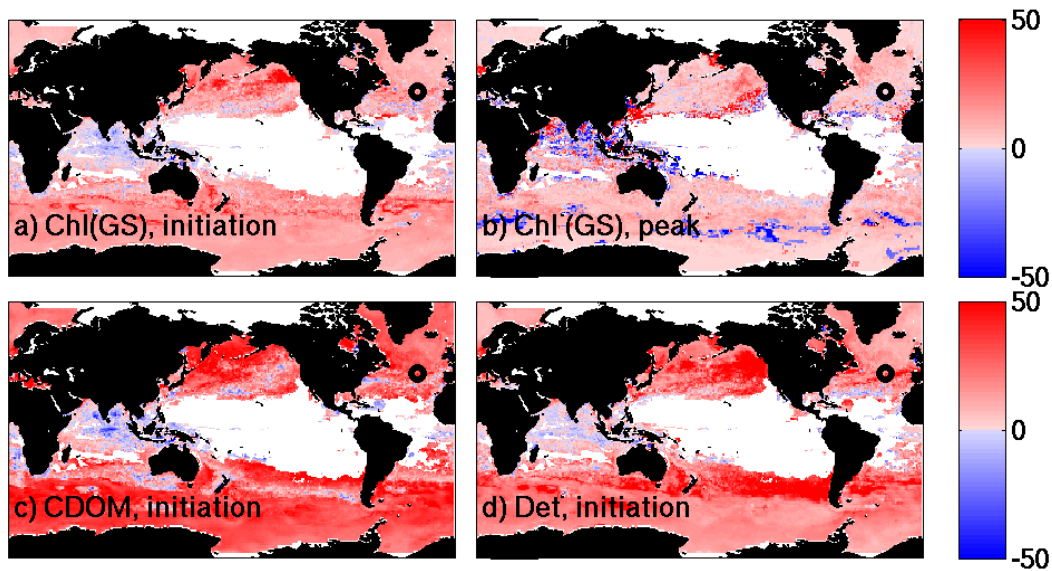

*Figure 9: Lag in phenology. Number of days between a) the initiation of the spring bloom from model actual Chl-a and that for the model derived Chl-a (GS); b) yearly maximum of model actual Chl-a and that for the derived Chl-a (GS); c) initiation of the spring bloom from model actual Chl-a and the initiation of the CDOM increase; d) initiation of the spring bloom from model actual Chl-a and the initiation of detrital particle increase. Bloom initiation is defined as when Chl-a, CDOM or detrital particles reach 5% above their annual median value (see Appendix A). Lack of output indicate did regions with no significant seasonal cycle or are not resolved by the model (e.g. Arctic Ocean).*

It might be useful to have a table presenting the numerical results (e.g. log/linear RMSE, absolute % bias, etc.) for each approach in Section 3 and 5, to make it easier to compare the different results.

We now plan to add two tables (Table 2 and 3, shown below), one for each section. We split into two tables, to avoid comparison between the daily and the monthly determined algorithms. We also emphasize this difference in the table 3's caption

|                      | Approach 1: GS | Approach 2: GA | Approach 3: RA |
|----------------------|----------------|----------------|----------------|
| $r^2$ (log space)    | 0.9088         | 0.9222         | 0.9466         |
| RMSE (log space)     | 0.1599         | 0.1477         | 0.1215         |
| $r^2$ (linear space) | 0.6014         | 0.7670         | 0.8301         |
| RMSE (linear space)  | 0.4816         | 0.3682         | 0.3083         |
| absolute % bias      | 22%            | 23%            | 17%            |

*Table 2: Results of comparison between model "actual" and model "satellite-like" derived Chl-a for the three algorithm approaches discussed in Section 3. Statistics are calculated for each grid, and each day*



over 15 years, except for grid cells and times with low light, very low Chl-a and shallow regions (see text).

|                      | Default | EXP-1:<br>uniform $a_{CDOM}$ | EXP-2:<br>uniform $a_{det}$ | EXP-3:<br>phytoplankton<br>optical same |
|----------------------|---------|------------------------------|-----------------------------|-----------------------------------------|
| $r^2$ (log space)    | 0.8999  | 0.8742                       | 0.8905                      | 0.9493                                  |
| RMSE (log space)     | 0.1678  | 0.1636                       | 0.1663                      | 0.1208                                  |
| $r^2$ (linear space) | 0.5373  | 0.6298                       | 0.5991                      | 0.7520                                  |
| RMSE (linear space)  | 0.4420  | 0.3811                       | 0.3962                      | 0.2591                                  |
| absolute % bias      | 21%     | 20%                          | 23%                         | 18%                                     |

**Table 3: Results of comparison between model “actual” and model “satellite-like” derived Chl-a for the sensitivity experiments discussed in Section 5. All “satellite-like” derived Chl-a was calculated using the GS approach. “Default” is the full experiment discussed in Section 3, but with monthly  $R_{RS}$  used to calculate the algorithm coefficients. Statistics are calculated for each grid, and each month over 15 years, except for grid and times with low light, very low Chl-a and shallow regions (see text).**

Fig 4 and Fig 8: Legends would make these plots easier to read.

Agreed. We will add these in the revised paper (see version of Fig 8 above).

Fig 5 and Fig 11: it would be useful to have a title or text on each graph to show which subplot is which e.g. “(a) GS”

Agreed, we will add these in the revised paper.

Fig 8: The thick black line on top of the other time series signals masks some of the detail of the derived Chl-a products, particularly after the first 3 months - could this be represented in a different way? Also, check the axis labels, I think Fig 8b is showing days, not months.

We’ve redone the figure with a thinner black line, and place it under the other lines: the resulting figures is clearer (see above). And yes, Fig 8b x-axis was days, we now change so that Fig 8a and 8b have the same x-axis. Thank you for catching this.

Technical Corrections:

P1 L15-16: missing the word “to” i.e. sentence should read “...derived Chl-a to the actual...”

Thank you – added in the revised text.

P1 L25: should be either “These results indicate” or “This result indicates”

Thanks – will fix in the revised text as “These results indicate....”

P9 L29: Should this sentence not end with a question mark? i.e. “. . .community structure)?”

Yes, will fix in revised text.

P11 L23: remove the second “like”

Thanks, will do

P12 L24: build should be built

Yes, thank you. Will fix in revised text.
